# Supplementary material
Source: PubMed Central journal article supplement (PMC8597727)
Supplement: aac.01105-21-s0001.pdf [file aac.01105-21-s0001.pdf]

**Supplementary Table 1. Test methods used by public health laboratories in the Antibiotic Resistance Laboratory Network, 2017–2019**

| PHLs Using Method | Organism Identification <sup>§</sup><br>(N=53) |                      |                        | Antimicrobial Susceptibility Testing<br>(N=41) |                             |                         | Carbapenemase Production<br>(N=53) |               | Molecular Detection of Carbapenemase Genes<br>(N=51) |                             |              |                                    |
|-------------------|------------------------------------------------|----------------------|------------------------|------------------------------------------------|-----------------------------|-------------------------|------------------------------------|---------------|------------------------------------------------------|-----------------------------|--------------|------------------------------------|
|                   | MALDI ToF<br>n (%)                             | Biochemical<br>n (%) | Other Method*<br>n (%) | Broth Microdilution<br>n (%)                   | Gradient Diffusion<br>n (%) | Disk Diffusion<br>n (%) | Other Method <sup>†</sup><br>n (%) | mCIM<br>n (%) | Carba NP<br>n (%)                                    | Gene Xpert Carba-R<br>n (%) | PCR<br>n (%) | Other Method <sup>‡</sup><br>n (%) |
| PHLs Using Method | 42 (80)                                        | 7 (13)               | 6 (11)                 | 19 (46)                                        | 10 (24)                     | 10 (24)                 | 2 (5)                              | 52 (98)       | 1 (2)                                                | 26 (51)                     | 23 (45)      | 2 (4)                              |

Abbreviations: PHL – public health laboratories; MALDI ToF – matrix-assisted laser desorption ionization-time of flight; mCIM – modified carbapenem inactivation method.

\*Includes automated testing instruments such as Vitek (BioMérieux, Marcy-l'Étoile, France).

<sup>†</sup>Includes automated testing instruments such as Microscan (Beckman Coulter, Brea, CA), and Phoenix (BD, Franklin Lakes, NJ).

<sup>‡</sup>Includes Streck ARM-D kit,  $\beta$ -Lactamase (Streck, Omaha NE), and Verigene Gram-Negative Blood Culture System (Nanosphere, Northbrook, IL).

<sup>§</sup>Some PHL used a combination of methods for any given category of testing, therefore the numbers may add up to more than the total.
